Correction

# Correction: Host-Specific Parvovirus Evolution in Nature Is Recapitulated by *In Vitro* Adaptation to Different Carnivore Species

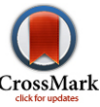

The *PLOS Pathogens* Staff

## Notice of Republication

This article was republished on November 20, 2014 to correct typographical errors in Table 1, which were introduced during the typesetting process. Please download this article again to view the correct version. The originally published, uncorrected article and the republished, corrected article are provided here for reference.

## Supporting Information

**File S1.** Originally published, uncorrected article.

**File S2.** Republished, corrected article.

## Reference

1. Allison AB, Kohler DJ, Ortega A, Hoover EA, Grove DM, et al. (2014) Host-Specific Parvovirus Evolution in Nature Is Recapitulated by *In Vitro* Adaptation to Different Carnivore Species. *PLoS Pathog* 10(11): e1004475. doi:10.1371/journal.ppat.1004475

**Citation:** The *PLOS Pathogens* Staff (2014) Correction: Host-Specific Parvovirus Evolution in Nature Is Recapitulated by *In Vitro* Adaptation to Different Carnivore Species. *PLoS Pathog* 10(12): e1004586. doi:10.1371/journal.ppat.1004586

**Published:** December 5, 2014

**Copyright:** © 2014 The *PLOS Pathogens* Staff. This is an open-access article distributed under the terms of the Creative Commons Attribution License, which permits unrestricted use, distribution, and reproduction in any medium, provided the original author and source are credited.
